# Supplementary material for: Stigmasterol prevents glucolipotoxicity induced defects in glucose-stimulated insulin secretion
Source: PubMed Central journal article supplement (PMC5573401; doi:10.1038/s41598-017-10209-0), 2017-08-25
Supplement: 41598_2017_10209_MOESM1_ESM.pdf [file 41598_2017_10209_MOESM1_ESM.pdf]

## **Stigmasterol prevents glucolipotoxicity induced defects in glucose-stimulated insulin secretion**

Meliza G. Ward, Ge Li, Valéria C. Barbosa-Lorenzi, Mingming Hao\*

Department of Biochemistry, Weill Cornell Medical College, New York, NY 10065

\*Corresponding author:

Department of Biochemistry, E-210, Weill Cornell Medical College, 1300 York Ave.,  
New York, NY 10065, USA. Phone: 212.746.6562. Fax: 212.746.8875. E-mail:  
mhao@med.cornell.edu

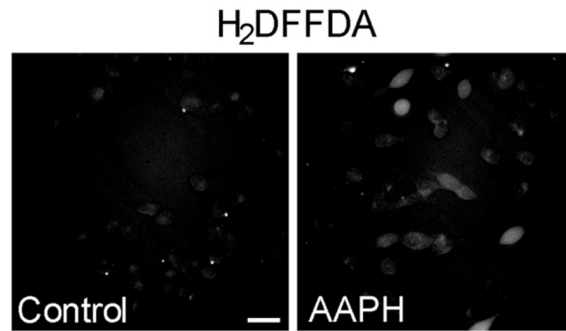

**Supplementary Figure 1. AAPH induces ROS production in INS-1 cells.** INS-1 cells were incubated for 1 h with 5 mg/ml AAPH and imaged using carboxy-H<sub>2</sub>DFFDA. Scale bar, 15  $\mu$ m.

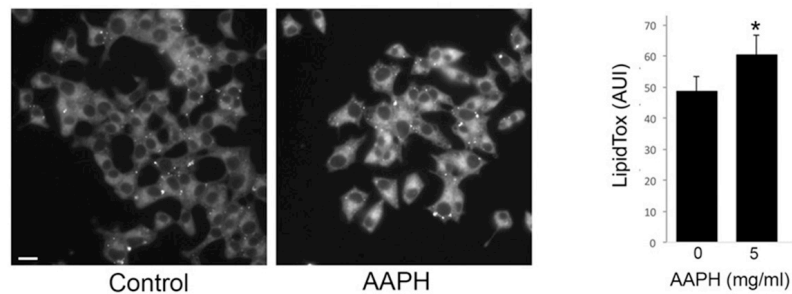

**Supplementary Figure 2. ROS induces neutral lipid accumulation in INS-1 cells.** Lipidtox staining of INS-1 cells incubated for 1 h with 5 mg/ml AAPH in serum free media. Scale bar, 15  $\mu$ m. Lipidtox intensity per cell was quantified. \* $p$ <0.05.

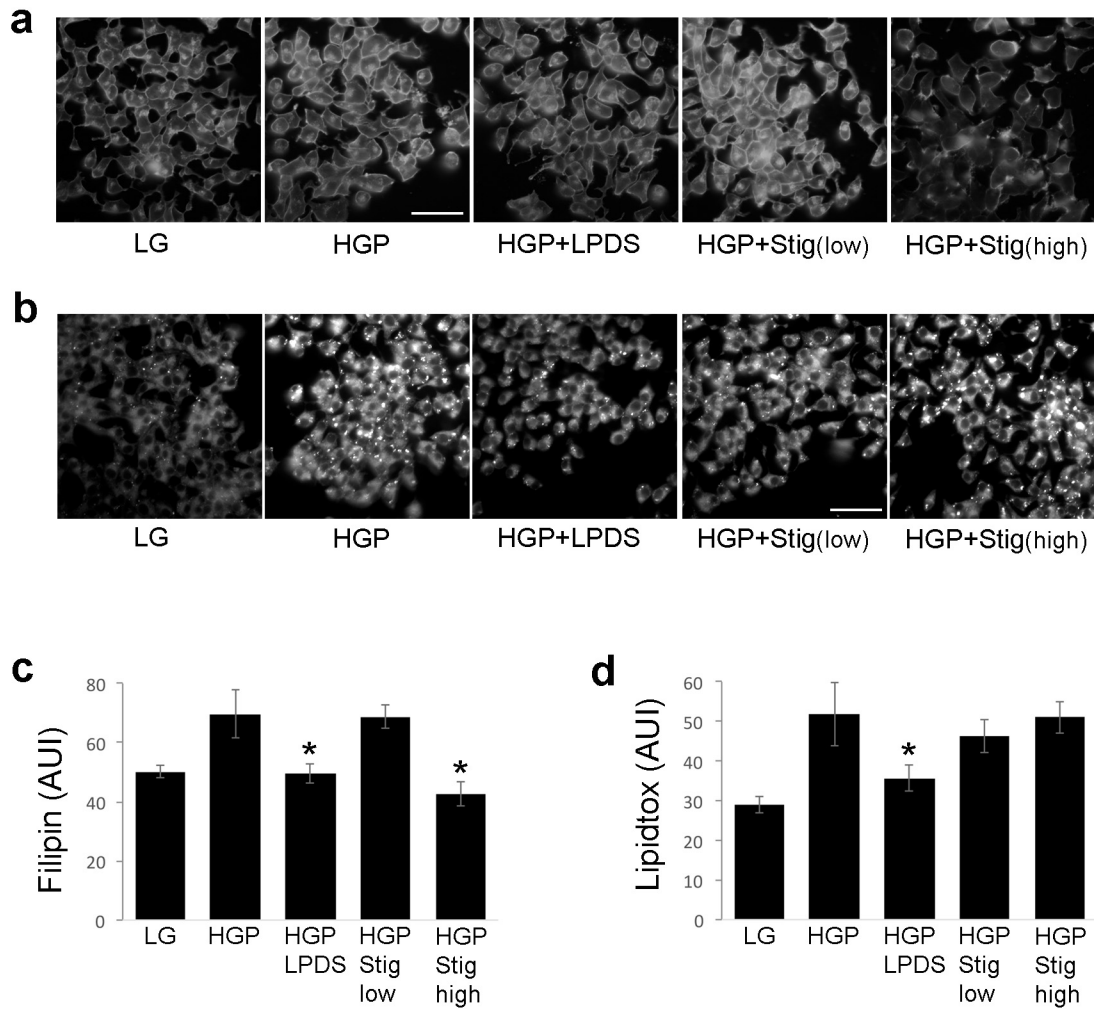

**Supplementary Figure 3. Reversal of HGP-induced cholesterol increase by LPDS and stigmaterol.** INS-1 cells treated for 72 h with LG, HGP, HGP+LPDS or HGP+stigmaterol (Stig) were stained with filipin (a) or lipidtox (b). Low and high stigmaterol concentration refers to 12.5  $\mu\text{g/ml}$  and 50  $\mu\text{g/ml}$ , respectively. Filipin (c) and lipidtox (d) fluorescence was quantified. Scale bars, 50  $\mu\text{m}$ . \* $p < 0.05$  against HGP.

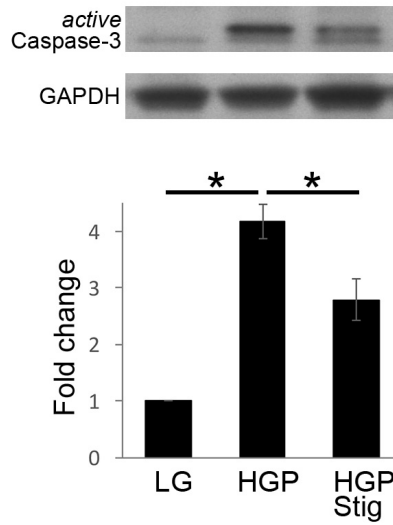

**Supplementary Figure 4. Stigmasterol reduces HGP-mediated apoptosis**

**indicated by decreased active caspase-3.** Cells were treated as indicated, lysed and immunoblotted for active (cleaved) caspase-3. Equal amounts of total protein were loaded and GAPDH was used as loading control. \* $p < 0.05$  against HGP.
